# Supplementary material for: Efficacy of Short-Term High-Dose Statin Pretreatment in Prevention of Contrast-Induced Acute Kidney Injury: Updated Study-Level Meta-Analysis of 13 Randomized Controlled Trials
Source: PubMed Central journal article supplement (PMC4219719; doi:10.1371/journal.pone.0111397), 2014-11-04

# File S1. Supporting Information File

## **Efficacy of Short-Term High-Dose Statin Pretreatment in Prevention of Contrast-Induced Acute Kidney Injury : Updated Study-Level Meta-Analysis of 13 Randomized Controlled Trials**

Joo Myung Lee, MD, MPH<sup>1†</sup>, Jonghanne Park, MD<sup>1†</sup>, Ki-Hyun Jeon, MD<sup>1</sup>,

Ji-hyun Jung, MD<sup>1</sup>, Sang Eun Lee, MD, PhD<sup>1</sup>, Jung-Kyu Han, MD, PhD<sup>1</sup>, [Hack-Lyoung Kim, MD, PhD](#)<sup>2</sup>, Han-Mo Yang, MD, PhD<sup>1</sup>, Kyung

Woo Park, MD, PhD<sup>1</sup>, Hyun-Jae Kang, MD, PhD<sup>1</sup>, Bon-Kwon Koo, MD, PhD<sup>1</sup>, Sang-Ho Jo, MD<sup>3</sup>,

Hyo-Soo Kim, MD, PhD<sup>1,4</sup>

<sup>1</sup>Department of Internal Medicine and Cardiovascular Center, Seoul National University Hospital, Seoul, Korea

<sup>2</sup>Cardiovascular Center, Seoul National University Boramae Medical Center, Seoul, Korea

<sup>3</sup>Division of Cardiology, Department of Internal Medicine, Hallym University Sacred Heart Hospital, Anyang-si, Gyeonggi-do, Korea

<sup>4</sup>Department of Molecular Medicine and Biopharmaceutical Sciences, Graduate School of Convergence Science and Technology, Seoul National University, Seoul, Korea.

## Supporting Methods

### Method S1. Search strategy

| Pubmed |                                                      |         | EMBASE |                                                                                                     |           | Cochrane Library |                                                      |        |
|--------|------------------------------------------------------|---------|--------|-----------------------------------------------------------------------------------------------------|-----------|------------------|------------------------------------------------------|--------|
| #21    | #18 AND #19 AND #20                                  | 128     | #22    | #21 AND ('clinical trial'/de OR 'controlled clinical trial'/de OR 'randomized controlled trial'/de) | 299       | #21              | #18 AND #19 AND #20                                  | 38     |
| #20    | #12 OR #13 OR #14 OR #15 OR #16 OR #17               | 483,790 | #21    | #18 AND #19 AND #20                                                                                 | 1,133     | #20              | #12 OR #13 OR #14 OR #15 OR #16 OR #17               | 11,822 |
| #19    | #3 OR #4 OR #5 OR #6 OR #7 OR #8 OR #9 OR #10 OR #11 | 38,965  | #20    | #12 OR #13 OR #14 OR #15 OR #16 OR #17                                                              | 715,000   | #19              | #3 OR #4 OR #5 OR #6 OR #7 OR #8 OR #9 OR #10 OR #11 | 7,380  |
| #18    | #1 OR #2                                             | 789,756 | #19    | #3 OR #4 OR #5 OR #6 OR #7 OR #8 OR #9 OR #10 OR #11                                                | 110,188   | #18              | #1 OR #2                                             | 22,825 |
| #17    | 'kidney failure'                                     | 79,639  | #18    | #1 OR #2                                                                                            | 1,376,056 | #17              | 'kidney failure':ti,ab,kw                            | 5,096  |
| #16    | 'renal insufficiency'                                | 31,322  | #17    | 'kidney failure'/syn                                                                                | 253,346   | #16              | 'renal insufficiency':ti,ab,kw                       | 1,504  |
| #15    | 'renal failure'                                      | 75,804  | #16    | 'renal insufficiency'/syn                                                                           | 253,346   | #15              | 'renal failure':ti,ab,kw                             | 3,015  |
| #14    | 'kidney injury'                                      | 35,238  | #15    | 'renal failure'/syn                                                                                 | 253,346   | #14              | 'kidney injury':ti,ab,kw                             | 866    |
| #13    | 'nephrotoxicity'                                     | 12,899  | #14    | 'kidney injury'/syn                                                                                 | 39,568    | #13              | 'nephrotoxicity':ti,ab,kw                            | 1,221  |
| #12    | 'nephropathy'                                        | 447,935 | #13    | 'nephrotoxicity'/syn                                                                                | 55,283    | #12              | 'nephropathy':ti,ab,kw                               | 3,281  |
| #11    | 'cerivastatin'                                       | 698     | #12    | 'nephropathy'/syn                                                                                   | 692,175   | #11              | 'cerivastatin':ti,ab,kw                              | 145    |
| #10    | 'lovastatin'                                         | 9,558   | #11    | 'cerivastatin'/syn                                                                                  | 4,015     | #10              | 'lovastatin':ti,ab,kw                                | 760    |
| #9     | 'pravastatin'                                        | 4,078   | #10    | 'lovastatin'/syn                                                                                    | 13,385    | #9               | 'pravastatin':ti,ab,kw                               | 1,335  |
| #8     | 'simvastatin'                                        | 7,670   | #9     | 'pravastatin'/syn                                                                                   | 16,960    | #8               | 'simvastatin':ti,ab,kw                               | 2,000  |

|    |                         |        |    |                         |          |    |                         |        |
|----|-------------------------|--------|----|-------------------------|----------|----|-------------------------|--------|
| #7 | 'rosuvastatin'          | 2,100  | #8 | 'simvastatin'/syn       | 27,935   | #7 | 'rosuvastatin':ti,ab,kw | 724    |
| #6 | 'atorvastatin'          | 6,201  | #7 | 'rosuvastatin'/syn      | 8,250    | #6 | 'atorvastatin':ti,ab,kw | 2,383  |
| #5 | 'hydroxymethylglutaryl' | 23,081 | #6 | 'atorvastatin'/syn      | 24,302   | #5 | 'hydroxymethylglutaryl' | 3279   |
| #4 | 'hmg-coa'               | 9,392  | #5 | 'hydroxymethylglutaryl' | 101,523  | #4 | 'hmg-coa':ti,ab,kw      | 683    |
| #3 | 'statin'                | 31,933 | #4 | 'hmgcoa'/syn            | 102,934  | #3 | 'statin':ti,ab,kw       | 2,114  |
| #2 | radiocontrast           | 913    | #3 | 'statin'/syn            | 21,670   | #2 | radiocontrast           | 116    |
|    |                         | 789,46 |    |                         |          |    |                         |        |
| #1 | 'contrast'              | 3      | #2 | radiocontrast           | 1,175    | #1 | 'contrast':ti,ab,kw     | 22,804 |
|    |                         |        |    |                         | 1,375,90 |    |                         |        |
|    |                         |        | #1 | 'contrast'/syn          | 1        |    |                         |        |

---

**Method S2.** Characteristics of the Excluded Studies

| No. | Title                                                                                                                                                                                                           | First Author              | Journal                                         | Main Reason for Exclusion                                                |
|-----|-----------------------------------------------------------------------------------------------------------------------------------------------------------------------------------------------------------------|---------------------------|-------------------------------------------------|--------------------------------------------------------------------------|
| 1   | Statin therapy reduces contrast-induced nephropathy: an analysis of contemporary percutaneous interventions                                                                                                     | Khanal, S et al.          | Am J Med 2005                                   | Not a randomized controlled trial                                        |
| 2   | Usefulness of statin pretreatment to prevent contrast-induced nephropathy and to improve long-term outcome in patients undergoing percutaneous coronary intervention                                            | Patti, G et al.           | Am J Cardiol 2008                               | Not a randomized controlled trial                                        |
| 3   | Association between high sensitivity C-reactive protein and contrast induced acute kidney injury in patients with acute coronary syndrome undergoing percutaneous coronary intervention: impact of atorvastatin | Su, J. Z et al.           | Zhonghua Xin Xue Guan Bing Za Zhi 2011          | Observational study<br>Multiple treatment group according to statin dose |
| 4   | Impact on renal function of rosuvastatin preload prior to elective percutaneous coronary intervention in chronic statin users                                                                                   | de Oliveira, M. S. et al. | Revista Brasileira de Cardiologia Invasiva 2012 | All the study population pre-defined to be on chronic statin use         |
| 5   | Effect of statins in contrast-induced nephropathy after coronary angiography                                                                                                                                    | Selmi, W et al.           | JACC: Cardiovascular Interventions 2013         | Post-hoc analysis of previous RCT                                        |
| 6   | The potential role of statins in contrast nephropathy                                                                                                                                                           | Attallah, N et al         | Clin Nephrol 2004                               | Not a randomized controlled trial                                        |
| 7   | Statin therapy and contrast-induced nephropathy after primary angioplasty                                                                                                                                       | Bouzas-Mosquera, A et al. | Int J Cardiol 2009                              | Not a randomized controlled trial                                        |

|    |                                                                                                                                                                                     |                    |                           |                                                                                         |
|----|-------------------------------------------------------------------------------------------------------------------------------------------------------------------------------------|--------------------|---------------------------|-----------------------------------------------------------------------------------------|
| 8  | Preventive effect of statin pretreatment on contrast-induced acute kidney injury in patients undergoing coronary angioplasty: Propensity score analysis from a multicenter registry | Hoshi, T et al.    | Int J Cardiol 2014        | Not a randomized controlled trial                                                       |
| 9  | Statins for prevention of contrast-induced nephropathy in patients undergoing non-emergent percutaneous coronary intervention                                                       | Kandula, P et al.  | Nephrology (Carlton) 2010 | Not a randomized controlled trial                                                       |
| 10 | Prevention of contrast-induced nephropathy by chronic pravastatin treatment in patients with cardiovascular disease and renal insufficiency                                         | Yoshida, S et al.  | J Cardiol 2009            | Not a randomized controlled trial<br>Treatment group defined as chronic pravastatin use |
| 11 | Effect of statins on contrast-induced nephropathy in patients with acute myocardial infarction treated with primary angioplasty                                                     | Zhao, J. L. et al. | Int J Cardiol 2008        | Not a randomized controlled trial                                                       |

## Supporting Tables

**Table S1.** The Cochrane Collaboration's tool for assessing risk of bias

| Study                                  | Domain                                                                                                                                                                          | Support for judgment & review authors' judgment                                                                                                                                                                                                                                                                                                                                               | Jadad Score |
|----------------------------------------|---------------------------------------------------------------------------------------------------------------------------------------------------------------------------------|-----------------------------------------------------------------------------------------------------------------------------------------------------------------------------------------------------------------------------------------------------------------------------------------------------------------------------------------------------------------------------------------------|-------------|
| <b>Acikel et al.</b>                   | Random Sequence Generation                                                                                                                                                      | Low risk of bias. Patients were randomized in 1:1 ratio to either CG or AG using a simple randomization method.                                                                                                                                                                                                                                                                               | 2           |
|                                        | Allocation concealment                                                                                                                                                          | Low risk of bias. Allocation concealment was not maintained throughout the study. First patient was randomly assigned to AG via a coin toss. Subsequent patients were then assigned to CG or AG in an alternating manner. However, the review authors judge that the outcome is not likely to be influenced by lack of concealment since all of the clinical outcome were objective findings. |             |
|                                        | Blinding of participants and personnel                                                                                                                                          | Low risk of bias. The study was a open-label trial comparing atrovastatin and non-treatment group. However, the review authors judge that the outcome is not likely to be influenced since the treatment protocol was pre-specified and the primary and additional endpoints were laboratory results.                                                                                         |             |
|                                        | Blinding of outcome assessment                                                                                                                                                  | Unclear. Insufficient information to permit judgment. Independency of laboratory measurement not stated.                                                                                                                                                                                                                                                                                      |             |
|                                        | Incomplete outcome data                                                                                                                                                         | Low risk of bias. A total of 160 patients were completely followed to the end of the study. None of the patients were excluded from final analysis.                                                                                                                                                                                                                                           |             |
|                                        | Selective reporting                                                                                                                                                             | Low risk of bias. All of the study's pre-specified (primary and secondary) outcomes that are of interest in the review have been reported in the pre-specified manner.                                                                                                                                                                                                                        |             |
|                                        | Other sources of bias                                                                                                                                                           | Low risk of bias. The study appears to be free of other sources of bias.                                                                                                                                                                                                                                                                                                                      |             |
|                                        | <b>ARMYDA-CIN</b>                                                                                                                                                               | Random Sequence Generation                                                                                                                                                                                                                                                                                                                                                                    |             |
| Allocation concealment                 | Low risk of bias. Central randomization. Randomization blocks were created and distributed to the 2 centers.                                                                    |                                                                                                                                                                                                                                                                                                                                                                                               |             |
| Blinding of participants and personnel | Low risk of bias. Double blinded placebo controlled clinical trial Physicians performing the procedure and follow-up assessment were not aware of the randomization assignment. |                                                                                                                                                                                                                                                                                                                                                                                               |             |
| Blinding of outcome assessment         | Low risk of bias. The primary and secondary outputs include objective laboratory test.                                                                                          |                                                                                                                                                                                                                                                                                                                                                                                               |             |
| Incomplete outcome data                | Low risk of bias. A total of 241 patients were completely followed to the end of the study. None of the patients were excluded from final analysis                              |                                                                                                                                                                                                                                                                                                                                                                                               |             |
| Selective reporting                    | Low risk of bias. All of the study's pre-specified (primary and secondary) outcomes that are of interest in the review have been reported in the pre-specified manner           |                                                                                                                                                                                                                                                                                                                                                                                               |             |
| Other sources of bias                  | Low risk of bias. The study appears to be free of other sources of bias.                                                                                                        |                                                                                                                                                                                                                                                                                                                                                                                               |             |
| <b>Cao et al.</b>                      | Random Sequence Generation                                                                                                                                                      | Low risk of bias. Patients were randomly allocated                                                                                                                                                                                                                                                                                                                                            | 2           |
| Allocation concealment                 | Unclear. Insufficient information to permit judgment, it is not clear whether allocation                                                                                        |                                                                                                                                                                                                                                                                                                                                                                                               |             |

|                   |                                                  |                                                                                                                                                                                                                                                                                                                                  |
|-------------------|--------------------------------------------------|----------------------------------------------------------------------------------------------------------------------------------------------------------------------------------------------------------------------------------------------------------------------------------------------------------------------------------|
|                   | concealment was maintained throughout the study. |                                                                                                                                                                                                                                                                                                                                  |
|                   | Blinding of participants and personnel           | Low risk of bias. Open-label study. Although, both patients and investigators were aware of the study group assignment, the review authors judge that the outcome is note likely to be influenced by unblinding since the treatmnet protocol was pre-specified and the primary endpoint was laboratory result.                   |
|                   | Blinding of outcome assessment                   | Unclear. Insufficient information to permit judgment. Independency of laboratory measurement and detection method not stated.                                                                                                                                                                                                    |
|                   | Incomplete outcome data                          | Low risk of bias. A total of 180 patients were completely followed to the end of the study. None of the patients were excluded from final analysis.                                                                                                                                                                              |
|                   | Selective reporting                              | Low risk of bias. All of the study's pre-specified (primary and secondary) outcomes that are of interest in the review have been reported in the pre-specified manner.                                                                                                                                                           |
|                   | Other sources of bias                            | Low risk of bias. The study appears to be free of other sources of bias.                                                                                                                                                                                                                                                         |
| <b>Hua et al.</b> | Random Sequence Generation                       | Low risk of bias. Patients were randomly allocated.                                                                                                                                                                                                                                                                              |
|                   | Allocation concealment                           | Unclear. Insufficient information to permit judgment, it is not clear whether allocation concealment was maintained throughout the study.                                                                                                                                                                                        |
|                   | Blinding of participants and personnel           | Low risk of bias. Open-label study. Although, both patients and investigators were aware of the study group assignment, the review authors judge that the outcome is note likely to be influenced by unblinding since the treatmnet protocol was pre-specified and the primary endpoint was laboratory result.                   |
|                   | Blinding of outcome assessment                   | Unclear. Insufficient information to permit judgment, it is not clear who performed serum creatinine measurement and the laboratory method.                                                                                                                                                                                      |
|                   | Incomplete outcome data                          | Low risk of bias. A total of 173 patients were completely followed to the end of the study. None of the patients were excluded from final analysis.                                                                                                                                                                              |
|                   | Selective reporting                              | Low risk of bias. All of the study's pre-specified (primary and secondary) outcomes that are of interest in the review have been reported in the pre-specified manner                                                                                                                                                            |
|                   | Other sources of bias                            | Low risk of bias. The study appears to be free of other sources of bias.                                                                                                                                                                                                                                                         |
| <b>NAPLES II</b>  | Random Sequence Generation                       | Low risk of bias. Randomization was performed by a 1:1 ratio with computer-generated random numbers.                                                                                                                                                                                                                             |
|                   | Allocation concealment                           | Unclear. Insufficient information to permit judgment, it is not clear whether allocation concealment was maintained throughout the study.                                                                                                                                                                                        |
|                   | Blinding of participants and personnel           | Low risk of bias. Open-label study. Although, both patients and investigators were aware of the study group assignment, the review authors judge that the outcome is note likely to be influenced by unblinding since the treatmnet protocol was pre-specified and the primary and additional endpoints were laboratory results. |
|                   | Blinding of outcome assessment                   | Unclear. Insufficient information to permit judgment. Independency of laboratory measurement and detection method not stated.                                                                                                                                                                                                    |
|                   | Incomplete outcome data                          | Low risk of bias. Despite of the 4% loss to follow-up rate, the authors provided daate of 17 patients lost at follow-up which were largely similarto those analyzed.                                                                                                                                                             |

2

3

|                     |                                        |                                                                                                                                                                                                                                                                                                                |   |
|---------------------|----------------------------------------|----------------------------------------------------------------------------------------------------------------------------------------------------------------------------------------------------------------------------------------------------------------------------------------------------------------|---|
|                     | Selective reporting                    | Low risk of bias. All of the study's pre-specified (primary and secondary) outcomes that are of interest in the review have been reported in the pre-specified manner.                                                                                                                                         |   |
|                     | Other sources of bias                  | Low risk of bias. The study appears to be free of other sources of bias.                                                                                                                                                                                                                                       |   |
| <b>Ozhan et al.</b> | Random Sequence Generation             | Low risk of bias. The patients were randomized to a short-term highdose atorvastatin plus NAC or only NAC.                                                                                                                                                                                                     |   |
|                     | Allocation concealment                 | Unclear. Insufficient information to permit judgment, it is not clear whether allocation concealment was maintained throughout the study.                                                                                                                                                                      |   |
|                     | Blinding of participants and personnel | Low risk of bias. Open-label study. Although, both patients and investigators were aware of the study group assignment, the review authors judge that the outcome is not likely to be influenced by unblinding since the treatment protocol was pre-specified and the primary endpoint was laboratory result.  | 3 |
|                     | Blinding of outcome assessment         | Unclear. Insufficient information to permit judgment. Independency of laboratory measurement not stated.                                                                                                                                                                                                       |   |
|                     | Incomplete outcome data                | Low risk of bias. A total of 130 patients were completely followed to the end of the study. None of the patients were excluded from final analysis.                                                                                                                                                            |   |
|                     | Selective reporting                    | Low risk of bias. All of the study's pre-specified (primary and secondary) outcomes that are of interest in the review have been reported in the pre-specified manner.                                                                                                                                         |   |
|                     | Other sources of bias                  | Low risk of bias. The study appears to be free of other sources of bias.                                                                                                                                                                                                                                       |   |
| <b>PRATO-ACS</b>    | Random Sequence Generation             | Low risk of bias. Randomization was performed by computerized using an electronic spreadsheet with blocks of 50 patients each.                                                                                                                                                                                 |   |
|                     | Allocation concealment                 | Low risk of bias. Randomization was performed on admission by computerized assignment.                                                                                                                                                                                                                         |   |
|                     | Blinding of participants and personnel | Low risk of bias. Although, both patients and investigators were aware of the study group assignment, the review authors judge that the outcome is not likely to be influenced by unblinding since the treatment protocol was pre-specified and the primary and additional endpoints were laboratory results.  |   |
|                     | Blinding of outcome assessment         | Low risk of bias. All tests were done in the author's hospital laboratory with consistent methodology.                                                                                                                                                                                                         | 5 |
|                     | Incomplete outcome data                | Low risk of bias. Data are missing in both intervention groups, but reasons for these are both reported and balanced.                                                                                                                                                                                          |   |
|                     | Selective reporting                    | Low risk of bias. All of the study's pre-specified (primary and secondary) outcomes that are of interest in the review have been reported in the pre-specified manner. The study protocol is available ( <a href="http://clinicaltrials.gov/show/NCT01185938">http://clinicaltrials.gov/show/NCT01185938</a> ) |   |
|                     | Other sources of bias                  | Low risk of bias. The study appears to be free of other sources of bias.                                                                                                                                                                                                                                       |   |
| <b>PROMISS</b>      | Random Sequence Generation             | Low risk of bias. Patients were randomized 1:1 by computer generated permuted block of 6 patients.                                                                                                                                                                                                             |   |
|                     | Allocation concealment                 | Low risk of bias. Patients were randomized by computer generated codes provided by the research member of the center after enrollment.                                                                                                                                                                         | 5 |
|                     | Blinding of participants and personnel | Low risk of bias. Eligible patients were randomly assigned to receive simvastatin or placebo.                                                                                                                                                                                                                  |   |



|                    |                                        |                                                                                                                                                                                                                                                                                                                                                           |   |
|--------------------|----------------------------------------|-----------------------------------------------------------------------------------------------------------------------------------------------------------------------------------------------------------------------------------------------------------------------------------------------------------------------------------------------------------|---|
|                    |                                        | Both patients and investigators were blinded to study group assignment                                                                                                                                                                                                                                                                                    |   |
|                    | Blinding of outcome assessment         | Low risk of bias. Serum creatinine levels were determined in a blinded fashion by laboratory personnel. Analysis was performed using autoanalyzers located in independent department of the center.                                                                                                                                                       |   |
|                    | Incomplete outcome data                | Low risk of bias. Data are missing in both intervention groups, but reasons for these are both reported and balanced. (6/124 (4.8%) from treatment group and 5/123 (4.1%) due to incomplete laboratory test results).                                                                                                                                     |   |
|                    | Selective reporting                    | Low risk of bias. All of the study's pre-specified (primary and secondary) outcomes that are of interest in the review have been reported in the pre-specified manner.<br>The study protocol is available ( <a href="http://clinicaltrials.gov/show/NCT00259441">http://clinicaltrials.gov/show/NCT00259441</a> )                                         |   |
|                    | Other sources of bias                  | Low risk of bias. The study appears to be free of other sources of bias.                                                                                                                                                                                                                                                                                  |   |
| <b>Toso et al.</b> | Random Sequence Generation             | Low risk of Bias. Randomization was performed by computerized assignment.                                                                                                                                                                                                                                                                                 |   |
|                    | Allocation concealment                 | Unclear. Insufficient information to permit judgment, it is not clear whether allocation concealment was maintained throughout the study, but the review authors judge that the outcome is not likely to be influenced by lack of blinding since all of the clinical outcome were objective findings.                                                     |   |
|                    | Blinding of participants and personnel | Low risk of Bias. Although the study was a open-label placebo controlled trial, the review authors judge that the outcome is note likely to be influenced by unblinding since the treatmnet protocol was pre-specified and the primary and additional endpoints were laboratory results or objective outcome (death and need for dialysus/hemofiltration) | 5 |
|                    | Blinding of outcome assessment         | Low risk of bias. Serum creatinine levels tests were performed in the same hospital laboratory with consistent methods.                                                                                                                                                                                                                                   |   |
|                    | Incomplete outcome data                | Low risk of bias. All patients presented for creatinine determination and clinical follow-up at 1 month.                                                                                                                                                                                                                                                  |   |
|                    | Selective reporting                    | Low risk of bias. All of the study's pre-specified (primary and secondary) outcomes that are of interest in the review have been reported in the pre-specified manner.                                                                                                                                                                                    |   |
|                    | Other sources of bias                  | Low risk of bias. The study appears to be free of other sources of bias.                                                                                                                                                                                                                                                                                  |   |
| <b>TRACK-D</b>     | Random Sequence Generation             | Low risk of bias. Block randomization was performed using computerized assignment with a block size of 6.                                                                                                                                                                                                                                                 |   |
|                    | Allocation concealment                 | Low risk of bias. Randomization was performed using computerized assignment by blinded envelopes.                                                                                                                                                                                                                                                         |   |
|                    | Blinding of participants and personnel | Low risk of bias. Open-label study. Although, both patients and investigators were aware of the study group assignment, the review authors judge that the outcome is note likely to be influenced by unblinding since the treatmnet protocol was pre-specified and the primary endpoint was laboratory result.                                            | 3 |
|                    | Blinding of outcome assessment         | Low risk of bias. All events and biomarkers were collected and adjudicated by a blinded, independent committee.                                                                                                                                                                                                                                           |   |

|                        |                                        |                                                                                                                                                                                                                                                                                                                                                                                                                                                           |   |
|------------------------|----------------------------------------|-----------------------------------------------------------------------------------------------------------------------------------------------------------------------------------------------------------------------------------------------------------------------------------------------------------------------------------------------------------------------------------------------------------------------------------------------------------|---|
|                        | Incomplete outcome data                | Low risk of bias. Data are missing in both intervention groups, but reasons for these are both reported and balanced.<br>The study protocol is available ( <a href="http://clinicaltrials.gov/show/NCT00786136">http://clinicaltrials.gov/show/NCT00786136</a> )                                                                                                                                                                                          |   |
|                        | Selective reporting                    | Low risk of bias. All of the study's pre-specified (primary and secondary) outcomes that are of interest in the review have been reported in the pre-specified manner.                                                                                                                                                                                                                                                                                    |   |
|                        | Other sources of bias                  | Low risk of bias. The study appears to be free of other sources of bias.                                                                                                                                                                                                                                                                                                                                                                                  |   |
| <b>Wei Li et al.</b>   | Random Sequence Generation             | Low risk of bias. Eligible patients were randomly assigned in a 1: 1 ratio to receive atorvastatin or placebo                                                                                                                                                                                                                                                                                                                                             |   |
|                        | Allocation concealment                 | Unclear. Insufficient information to permit judgment, it is not clear whether allocation concealment was maintained throughout the study, but the review authors judge that the outcome is not likely to be influenced since all of the clinical outcome were objective findings.                                                                                                                                                                         |   |
|                        | Blinding of participants and personnel | Low risk of bias. The study is a double-blinded placebo-controlled trial.                                                                                                                                                                                                                                                                                                                                                                                 |   |
|                        | Blinding of outcome assessment         | Low risk of bias. The primary and secondary outputs include objective laboratory test.                                                                                                                                                                                                                                                                                                                                                                    |   |
|                        | Incomplete outcome data                | Low risk of bias. A total of 161 patients were completely followed to the end of the study. None of the patients were excluded from final analysis. Exclusion of non-PCI patient was done after randomization (12/90 (13.3%) for treatment group and 7/90 (7.8%) for control group). However, the review authors judge that the outcome is not likely to be influenced since the baseline characteristics of both group remained similar between groups.. | 4 |
|                        | Selective reporting                    | Low risk of bias. All of the study's pre-specified (primary and secondary) outcomes that are of interest in the review have been reported in the pre-specified manner                                                                                                                                                                                                                                                                                     |   |
|                        | Other sources of bias                  | Low risk of bias. The study appears to be free of other sources of bias.                                                                                                                                                                                                                                                                                                                                                                                  |   |
| <b>Xinwei et al.</b>   | Random Sequence Generation             | Low risk of bias. Patients were randomized 1:1 by a computer-generated permuted block of 8 patients                                                                                                                                                                                                                                                                                                                                                       |   |
|                        | Allocation concealment                 | Low risk of bias. Randomized codes were provided by the research member of the center who was unaware of the data in the present study.                                                                                                                                                                                                                                                                                                                   |   |
|                        | Blinding of participants and personnel | Low risk of bias. Although, both patients and investigators were aware of the study group assignment, the review authors judge that the outcome is not likely to be influenced by unblinding since the treatment protocol was pre-specified and the primary and additional endpoints were laboratory results.                                                                                                                                             | 3 |
|                        | Blinding of outcome assessment         | Unclear. Insufficient information to permit judgment. Independency of laboratory measurement and detection method not stated.                                                                                                                                                                                                                                                                                                                             |   |
|                        | Incomplete outcome data                | Low risk of bias. A total of 228 patients were completely followed to the end of the study. None of the patients were excluded from final analysis.                                                                                                                                                                                                                                                                                                       |   |
|                        | Selective reporting                    | Low risk of bias. All of the study's pre-specified (primary and secondary) outcomes that are of interest in the review have been reported in the pre-specified manner.                                                                                                                                                                                                                                                                                    |   |
|                        | Other sources of bias                  | Low risk of bias. The study appears to be free of other sources of bias.                                                                                                                                                                                                                                                                                                                                                                                  |   |
| <b>Zhao Xia et al.</b> | Random Sequence Generation             | Low risk of bias. Patients were randomly allocated                                                                                                                                                                                                                                                                                                                                                                                                        | 3 |

---

|                                        |                                                                                                                                                                                                                                                                      |
|----------------------------------------|----------------------------------------------------------------------------------------------------------------------------------------------------------------------------------------------------------------------------------------------------------------------|
| Allocation concealment                 | Unclear. Insufficient information to permit judgment, it is not clear whether allocation concealment was maintained throughout the study.                                                                                                                            |
| Blinding of participants and personnel | Low risk of Bias. Although the study was a open-label trial, the review authors judge that the outcome is not likely to be influenced by unblinding since the treatment protocol was pre-specified and the primary and additional endpoints were laboratory results. |
| Blinding of outcome assessment         | Unclear. Insufficient information to permit judgment, it is not clear who performed serum creatinine measurement and the laboratory method.                                                                                                                          |
| Incomplete outcome data                | Low risk of bias. A total of 100 patients were completely followed to the end of the study. None of the patients were excluded from final analysis.                                                                                                                  |
| Selective reporting                    | Low risk of bias. All of the study's pre-specified (primary and secondary) outcomes that are of interest in the review have been reported in the pre-specified manner.                                                                                               |
| Other sources of bias                  | Low risk of bias. The study appears to be free of other sources of bias.                                                                                                                                                                                             |

---

**Figure S1. Risk of Bias Graph and Summary Figure**

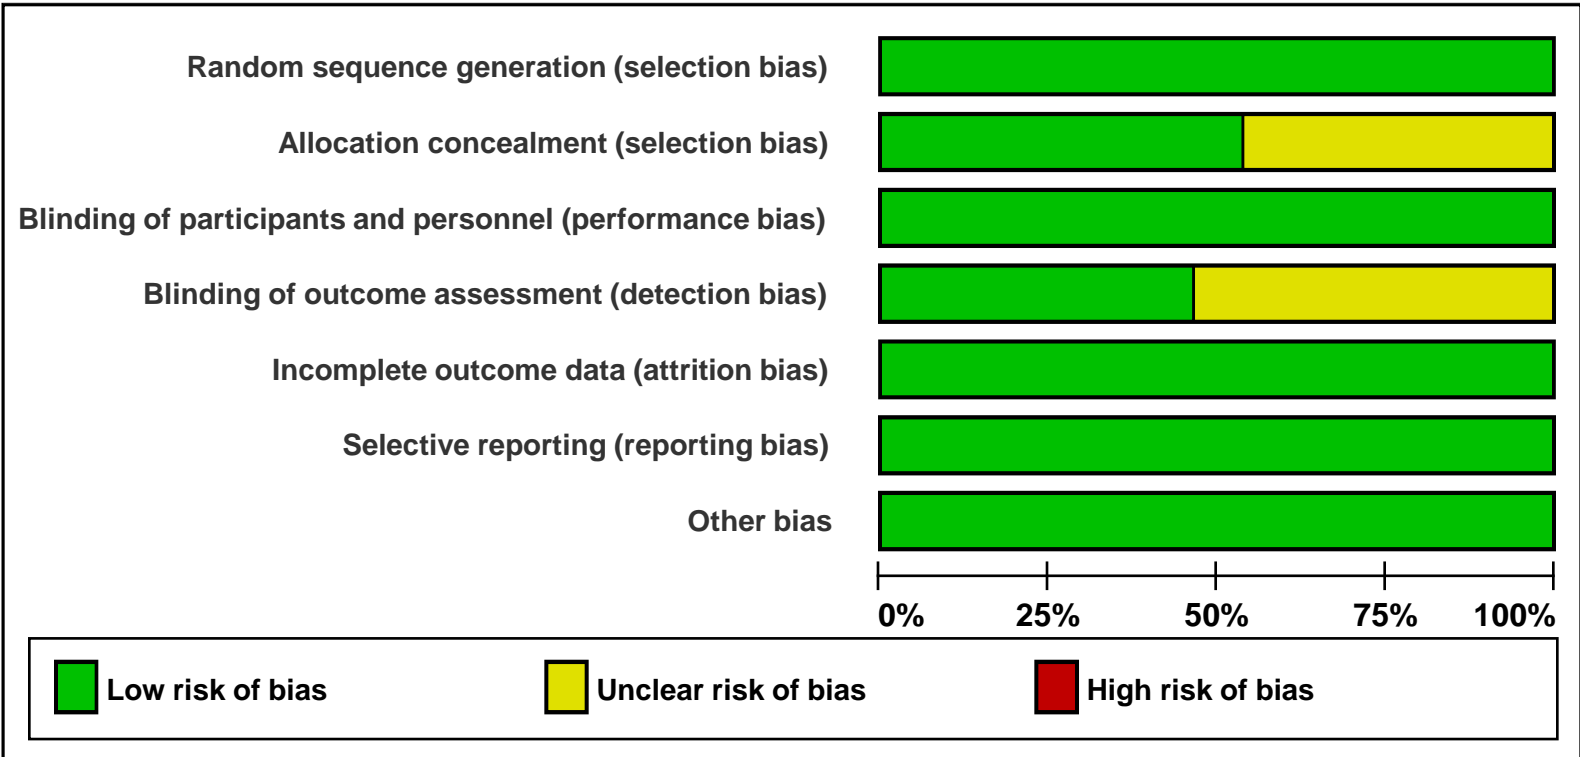

**Figure S2. Risk of Bias Graph and Summary Figure**

| <i>Zhao Xia et al.</i> | <i>Xinwei et al.</i> | <i>Wei li et al.</i> | <i>TRACK-D</i> | <i>Toso et al.</i> | <i>PROMISS</i> | <i>PRATO-ACS</i> | <i>Ozhan et al.</i> | <i>NAPLES II</i> | <i>Hua et al.</i> | <i>Cao et al.</i> | <i>ARMYDA CIN</i> | <i>Acikel et al.</i> |                                                           |
|------------------------|----------------------|----------------------|----------------|--------------------|----------------|------------------|---------------------|------------------|-------------------|-------------------|-------------------|----------------------|-----------------------------------------------------------|
| +                      | +                    | +                    | +              | +                  | +              | +                | +                   | +                | +                 | +                 | +                 | +                    | Random sequence generation (selection bias)               |
| ?                      | +                    | +                    | +              | ?                  | +              | +                | ?                   | ?                | ?                 | ?                 | +                 | +                    | Allocation concealment (selection bias)                   |
| +                      | +                    | +                    | +              | +                  | +              | +                | +                   | +                | +                 | +                 | +                 | +                    | Blinding of participants and personnel (performance bias) |
| ?                      | ?                    | +                    | +              | +                  | +              | +                | ?                   | ?                | ?                 | ?                 | +                 | ?                    | Blinding of outcome assessment (detection bias)           |
| +                      | +                    | +                    | +              | +                  | +              | +                | +                   | +                | +                 | +                 | +                 | +                    | Incomplete outcome data (attrition bias)                  |
| +                      | +                    | +                    | +              | +                  | +              | +                | +                   | +                | +                 | +                 | +                 | +                    | Selective reporting (reporting bias)                      |
| +                      | +                    | +                    | +              | +                  | +              | +                | +                   | +                | +                 | +                 | +                 | +                    | Other bias                                                |

# Figure S3. Overall Fixed Effects Model

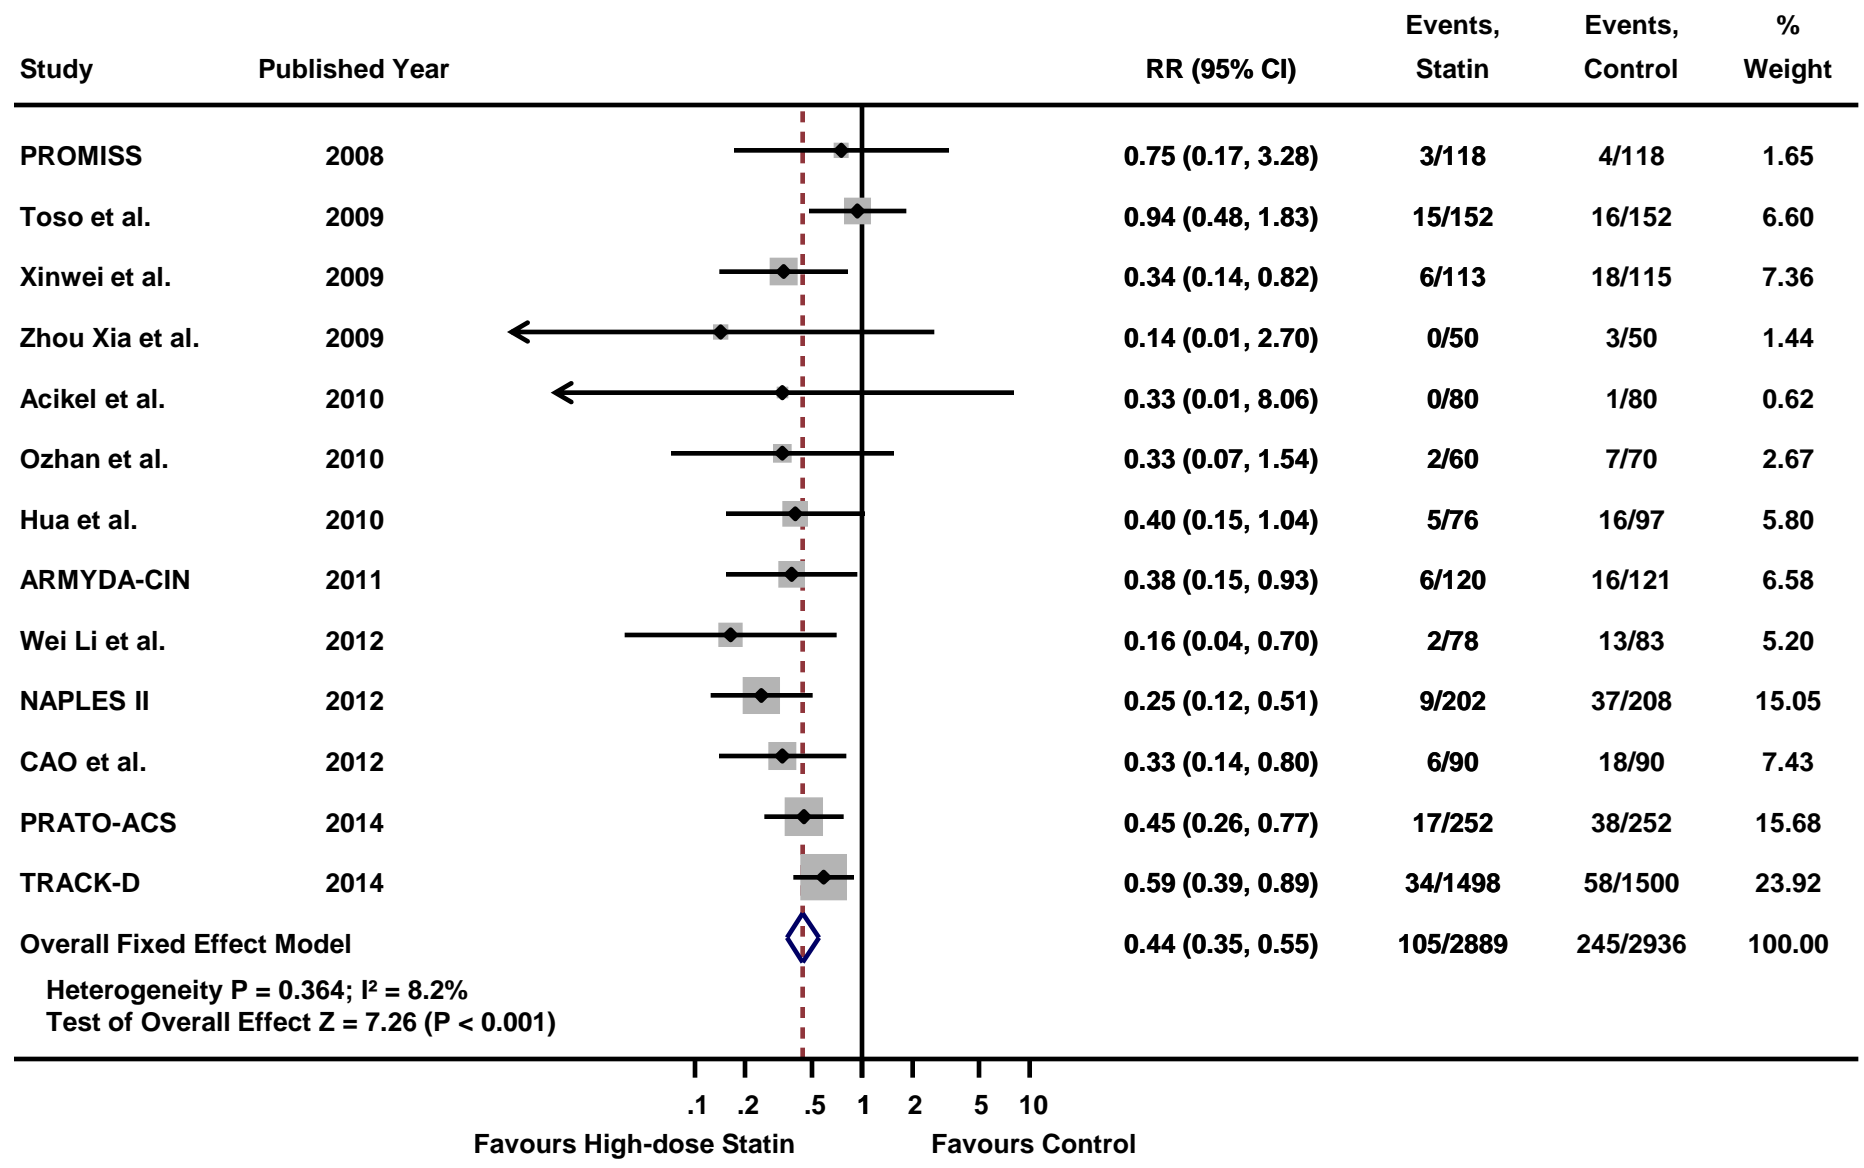

# Figure S4. Assessment of the Small Study Effect Bias

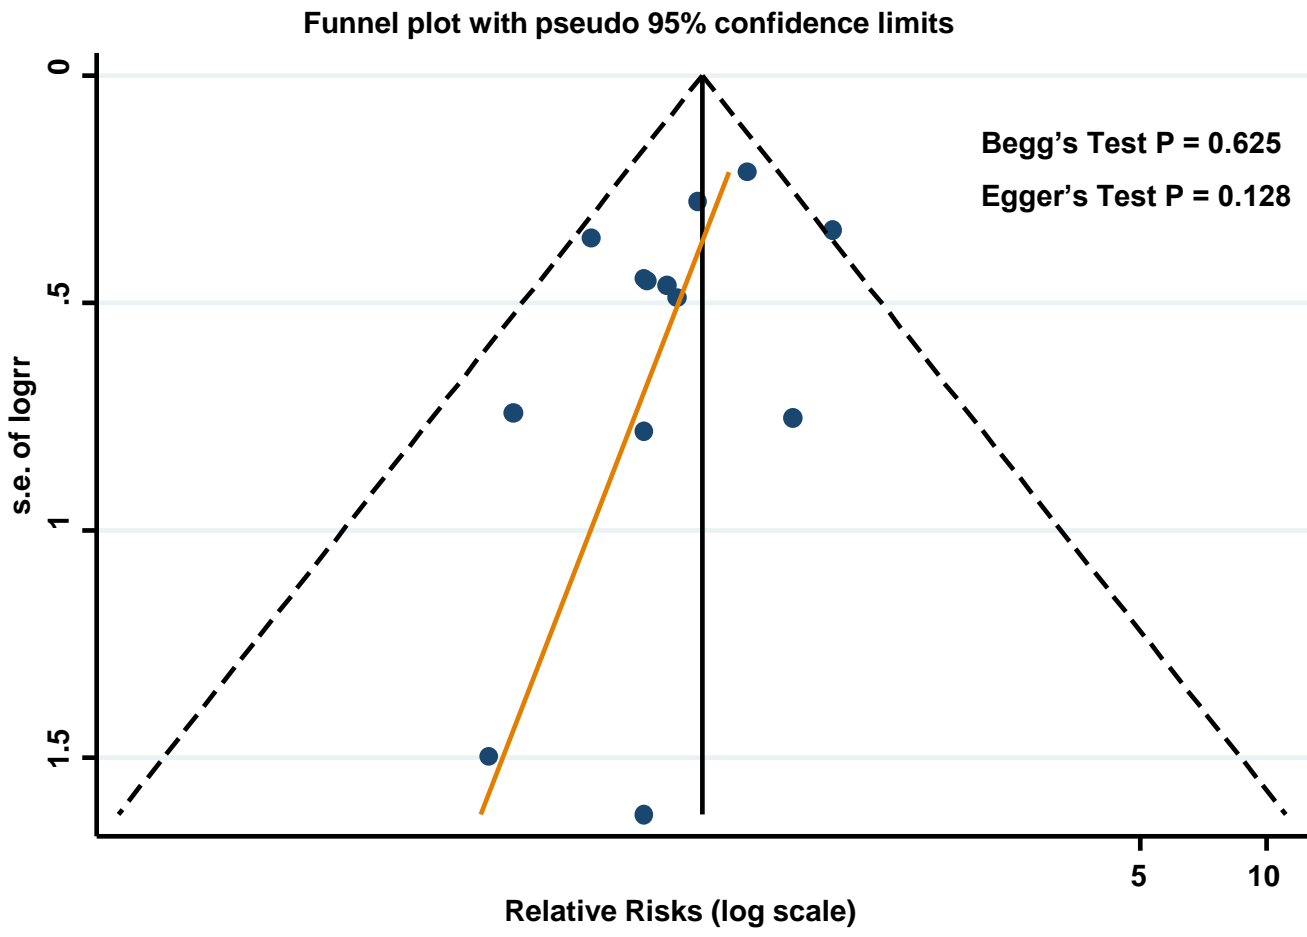

**Figure S5. Influence of Individual Studies**

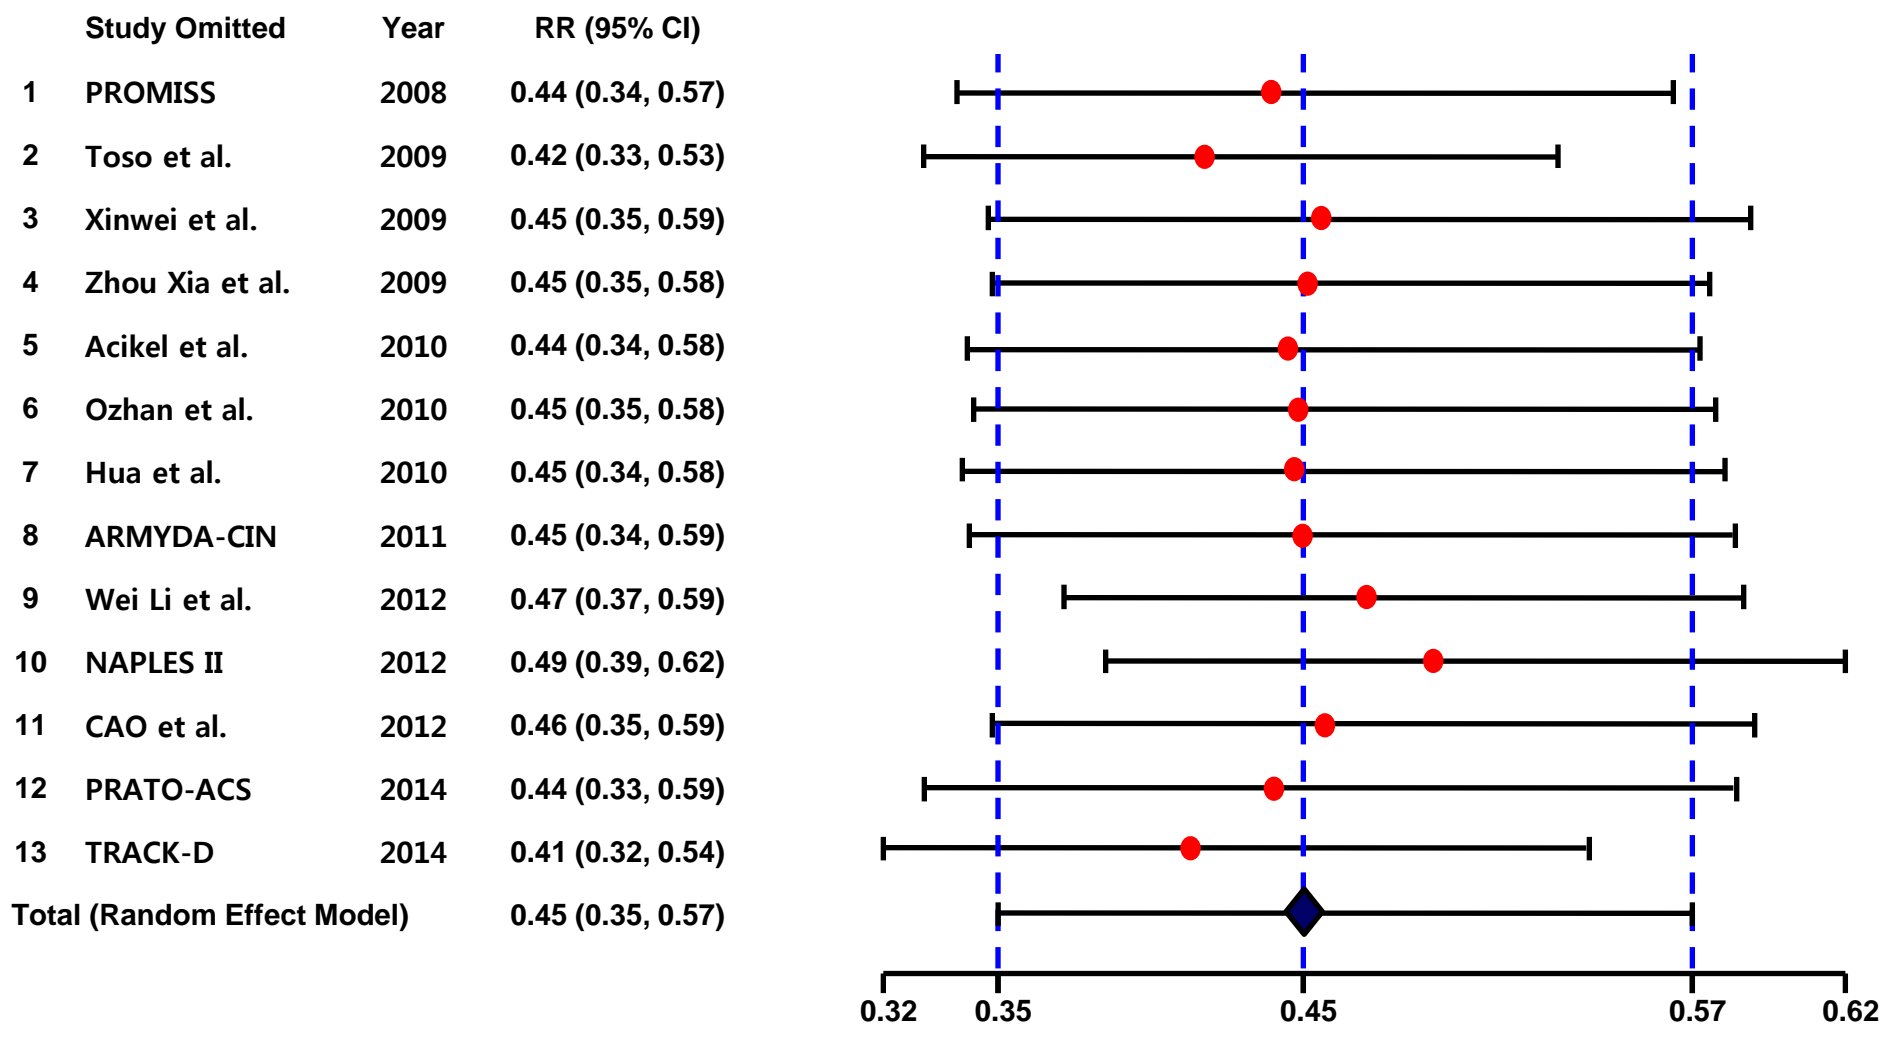



# Figure S6. Cumulative Meta-analysis

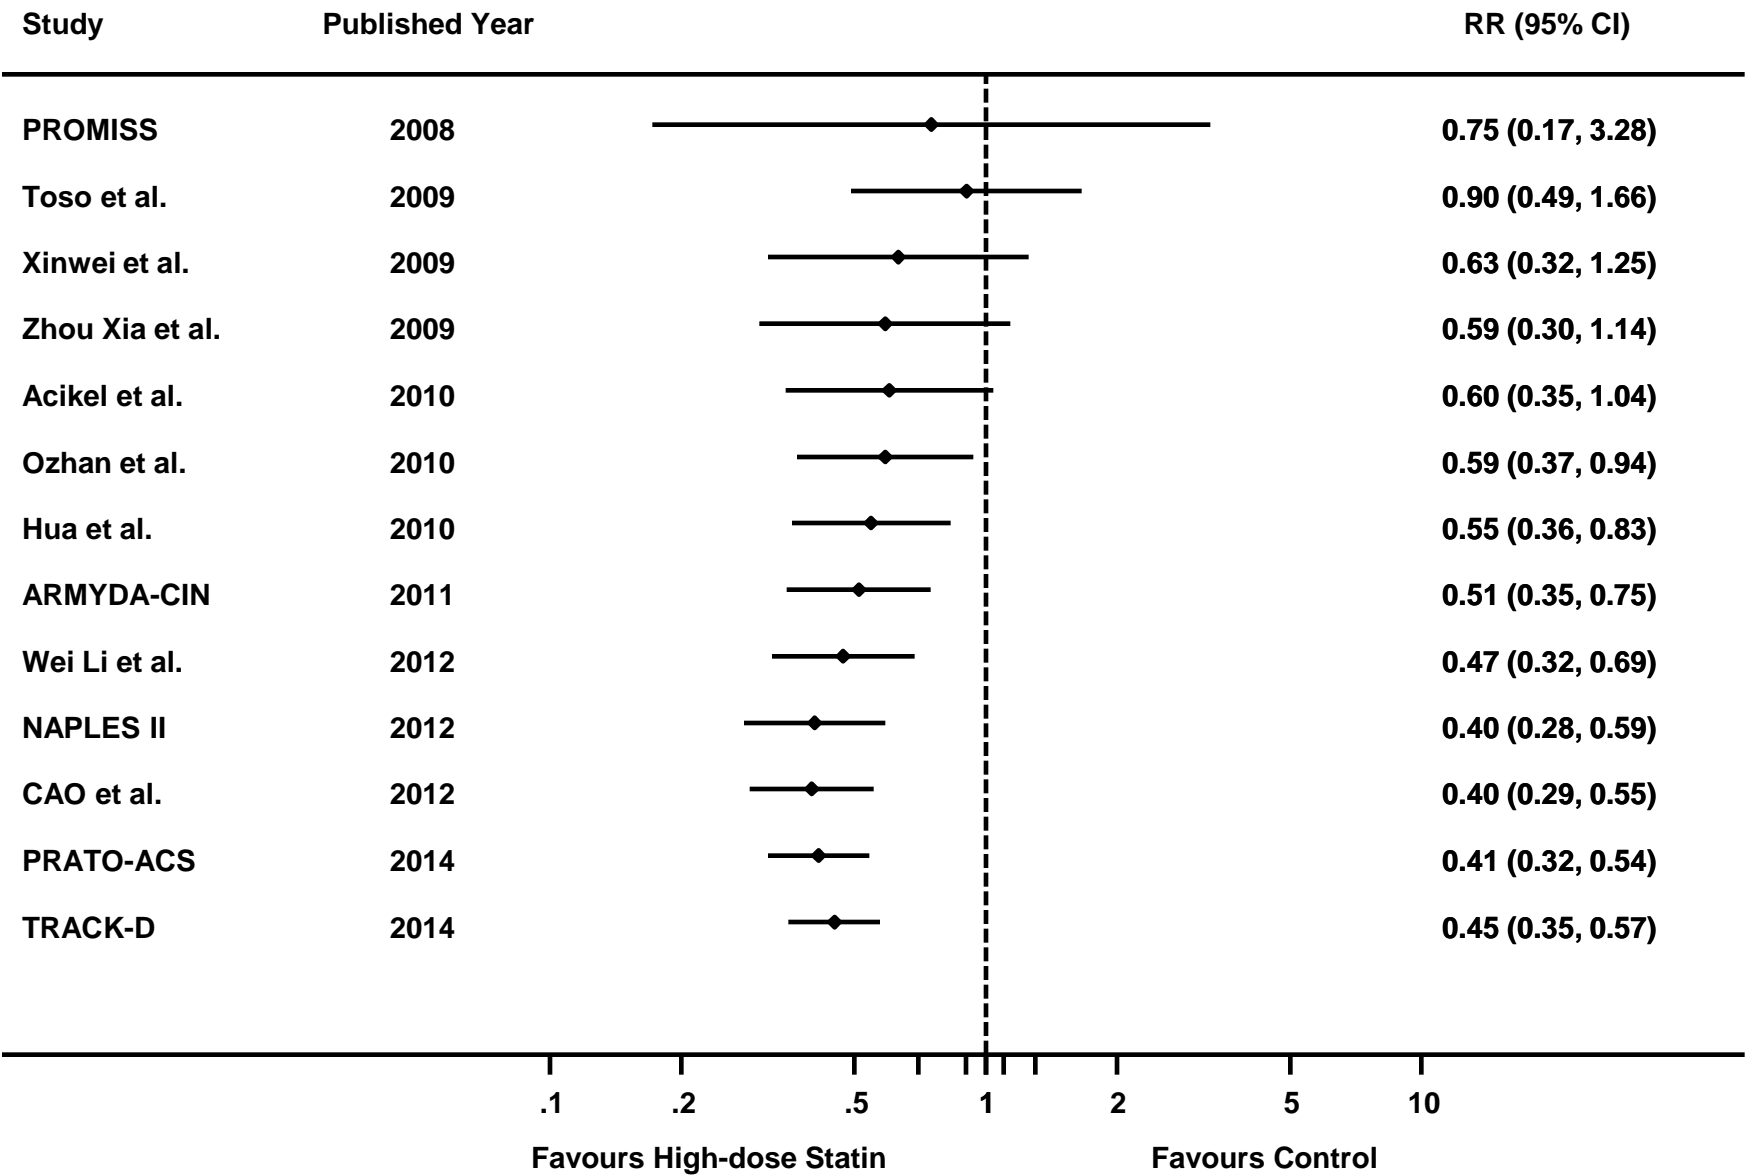

# Figure S7. Random Effects Model of Change of Serum Creatinine

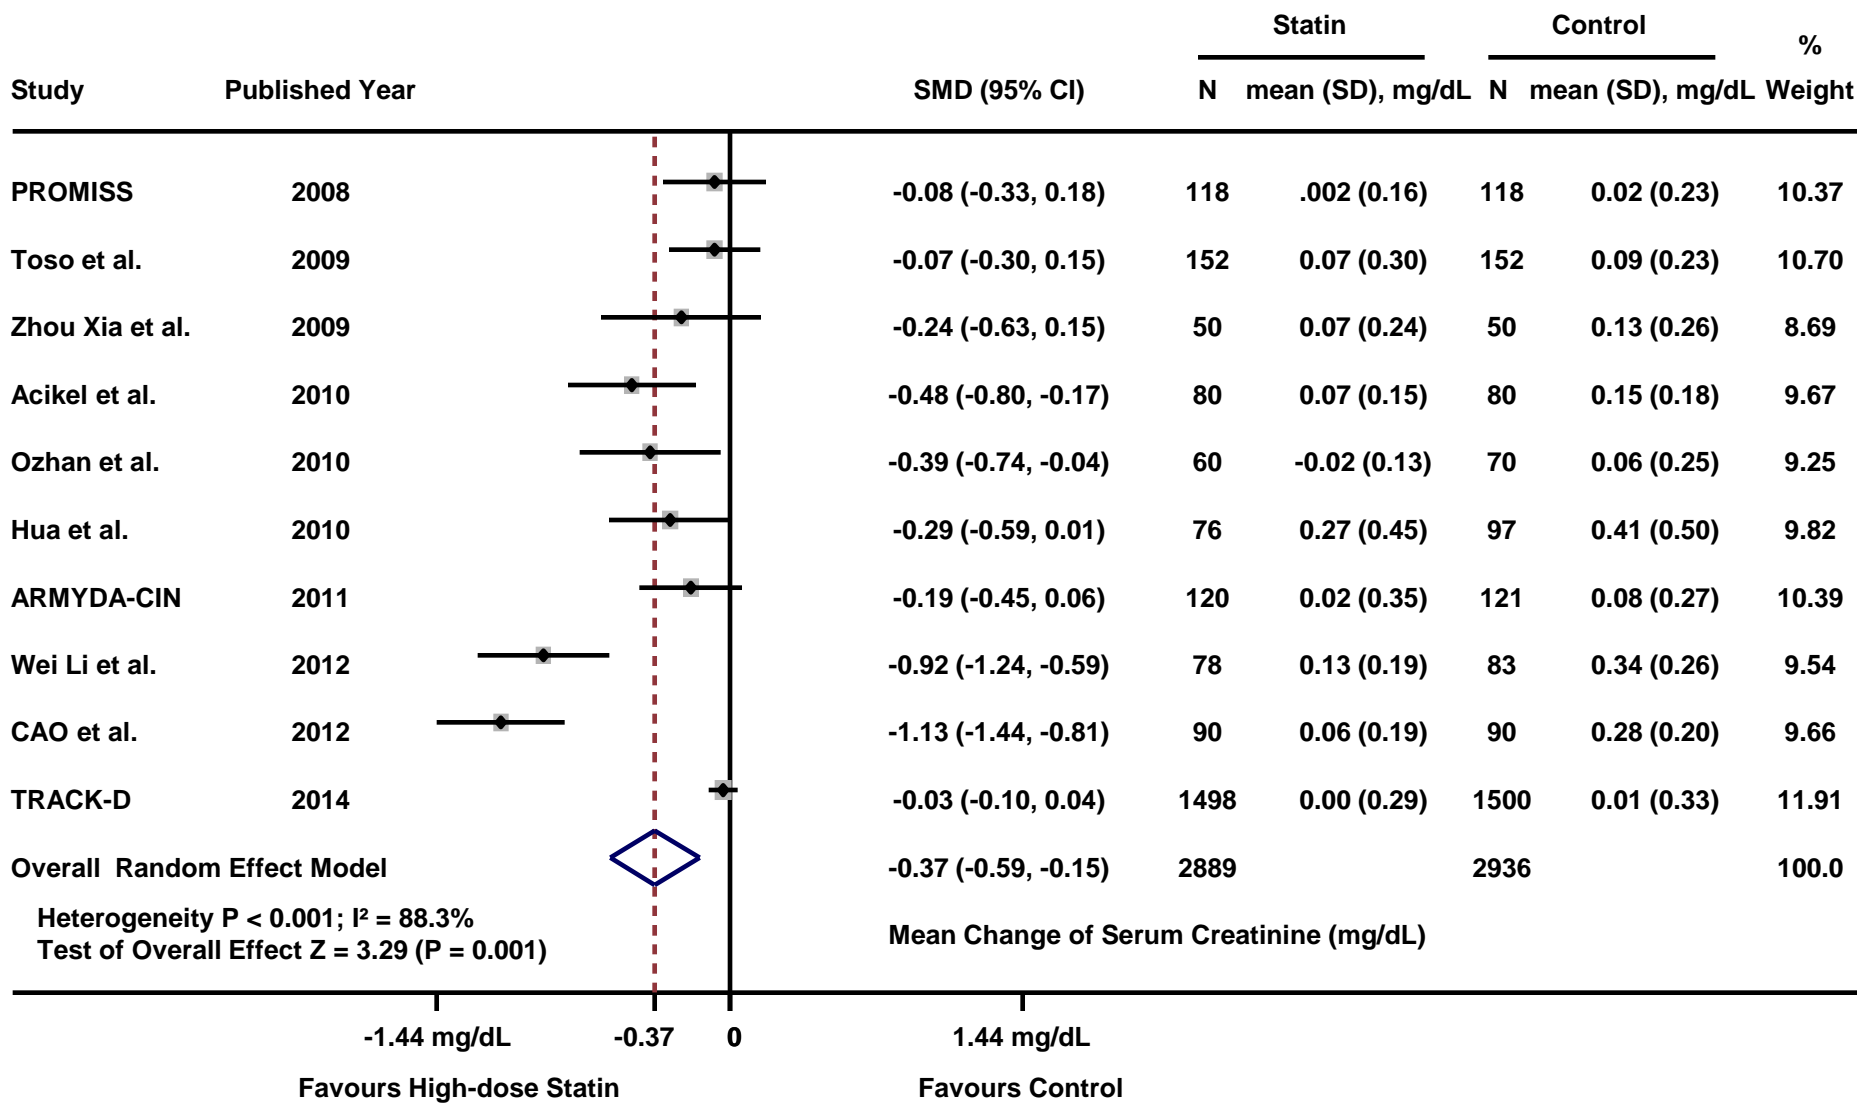

# Figure S8. Subgroup According to Type of Contrast

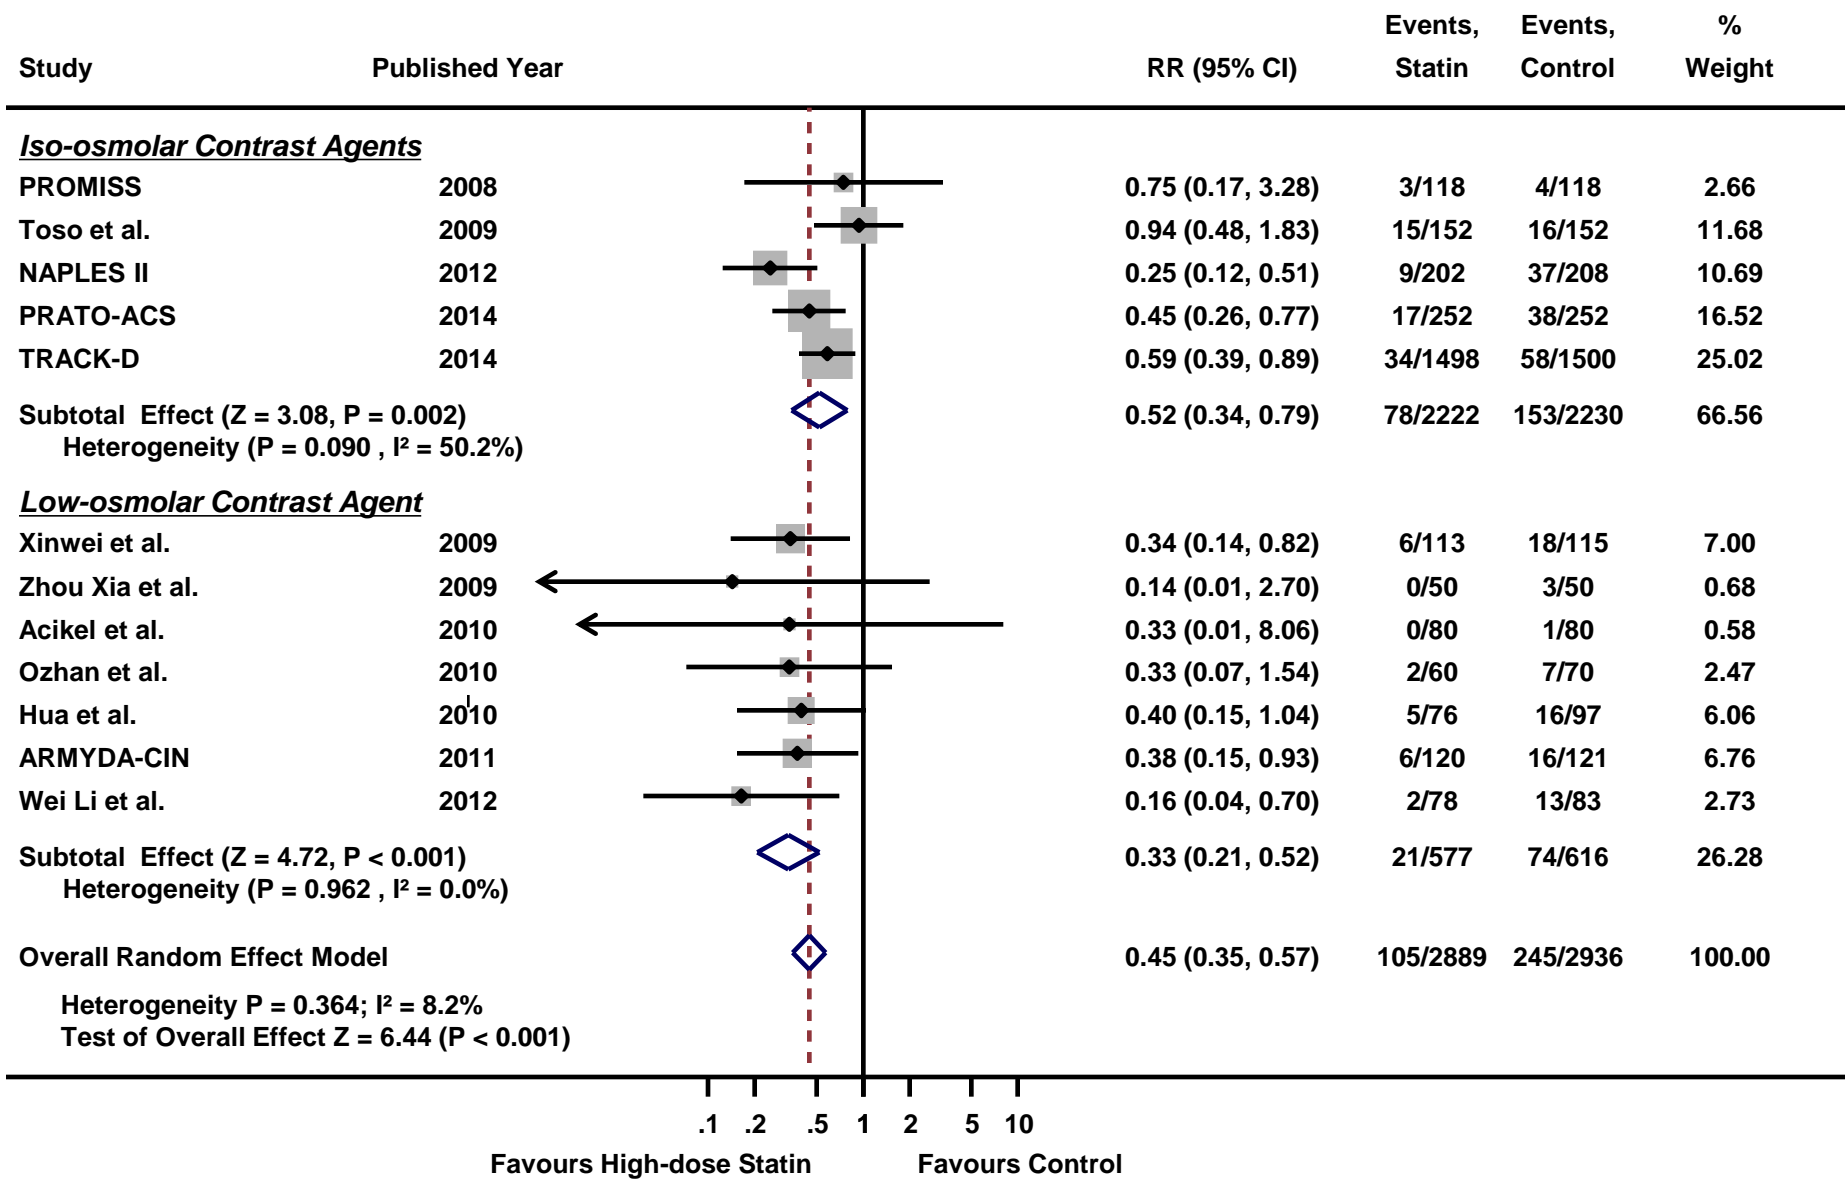

# Figure S9. Subgroup According to Age of Patients

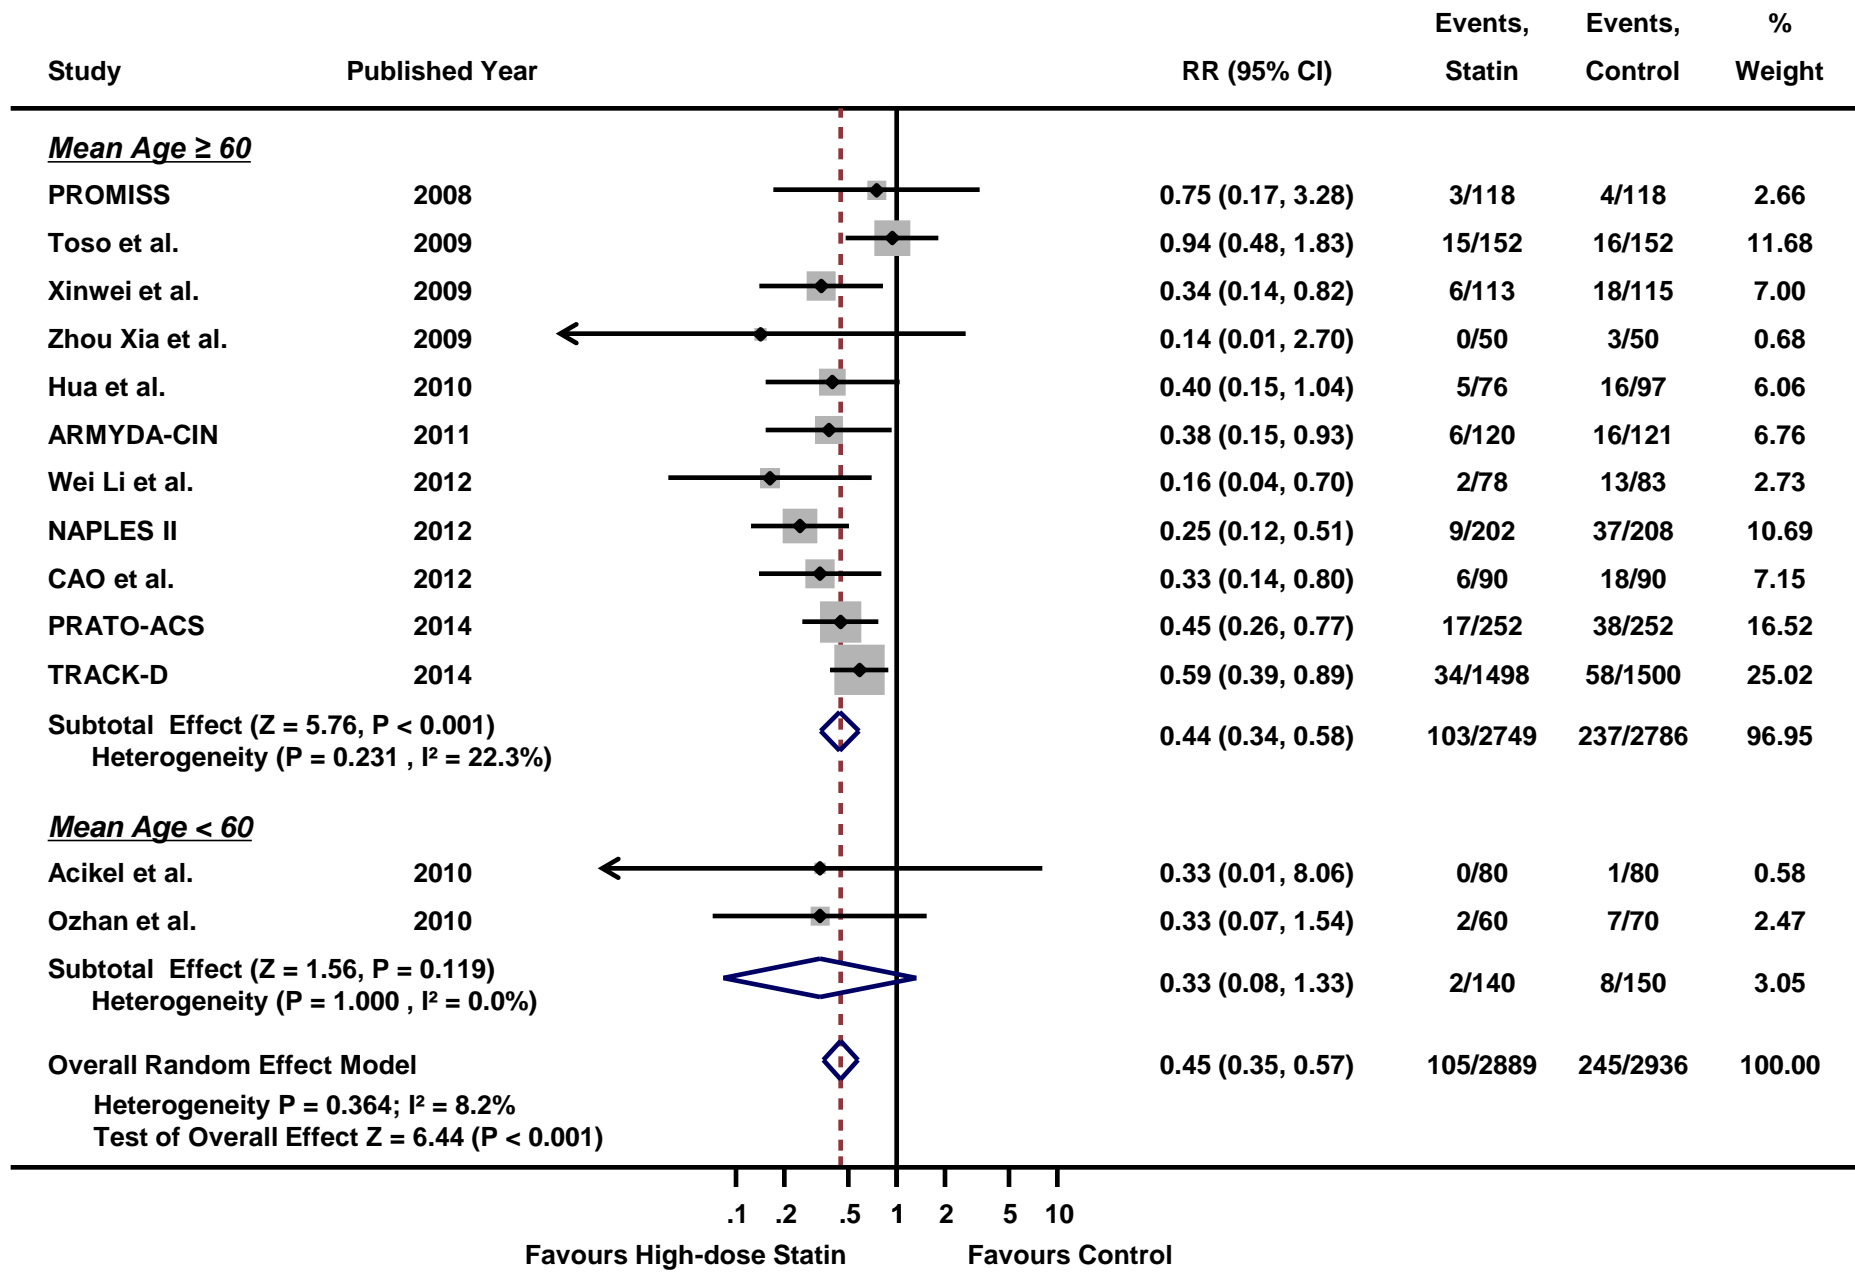

# Figure S10. Subgroup According to Chronic Kidney Disease

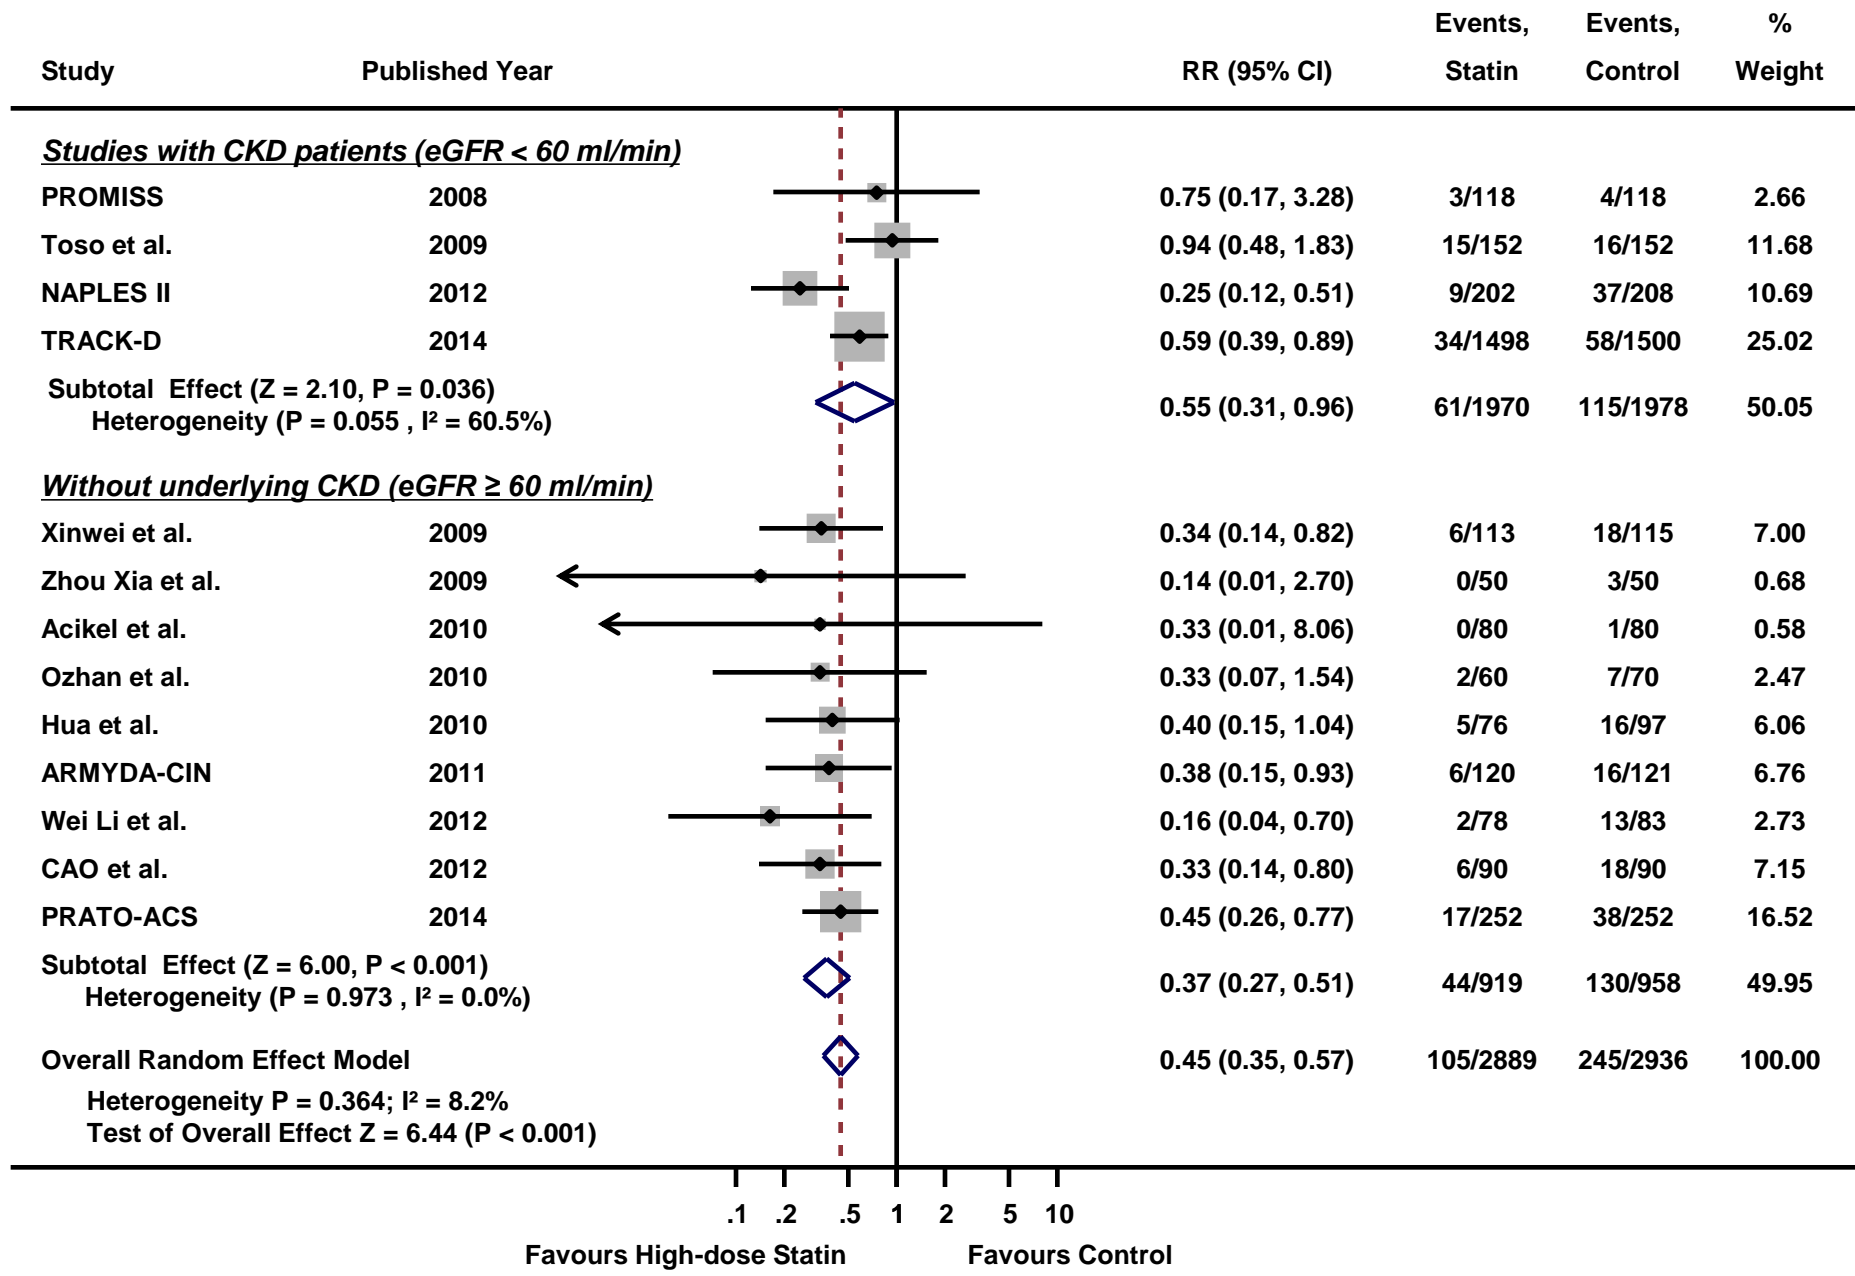

# Figure S11. Subgroup According to Acute Coronary Syndrome

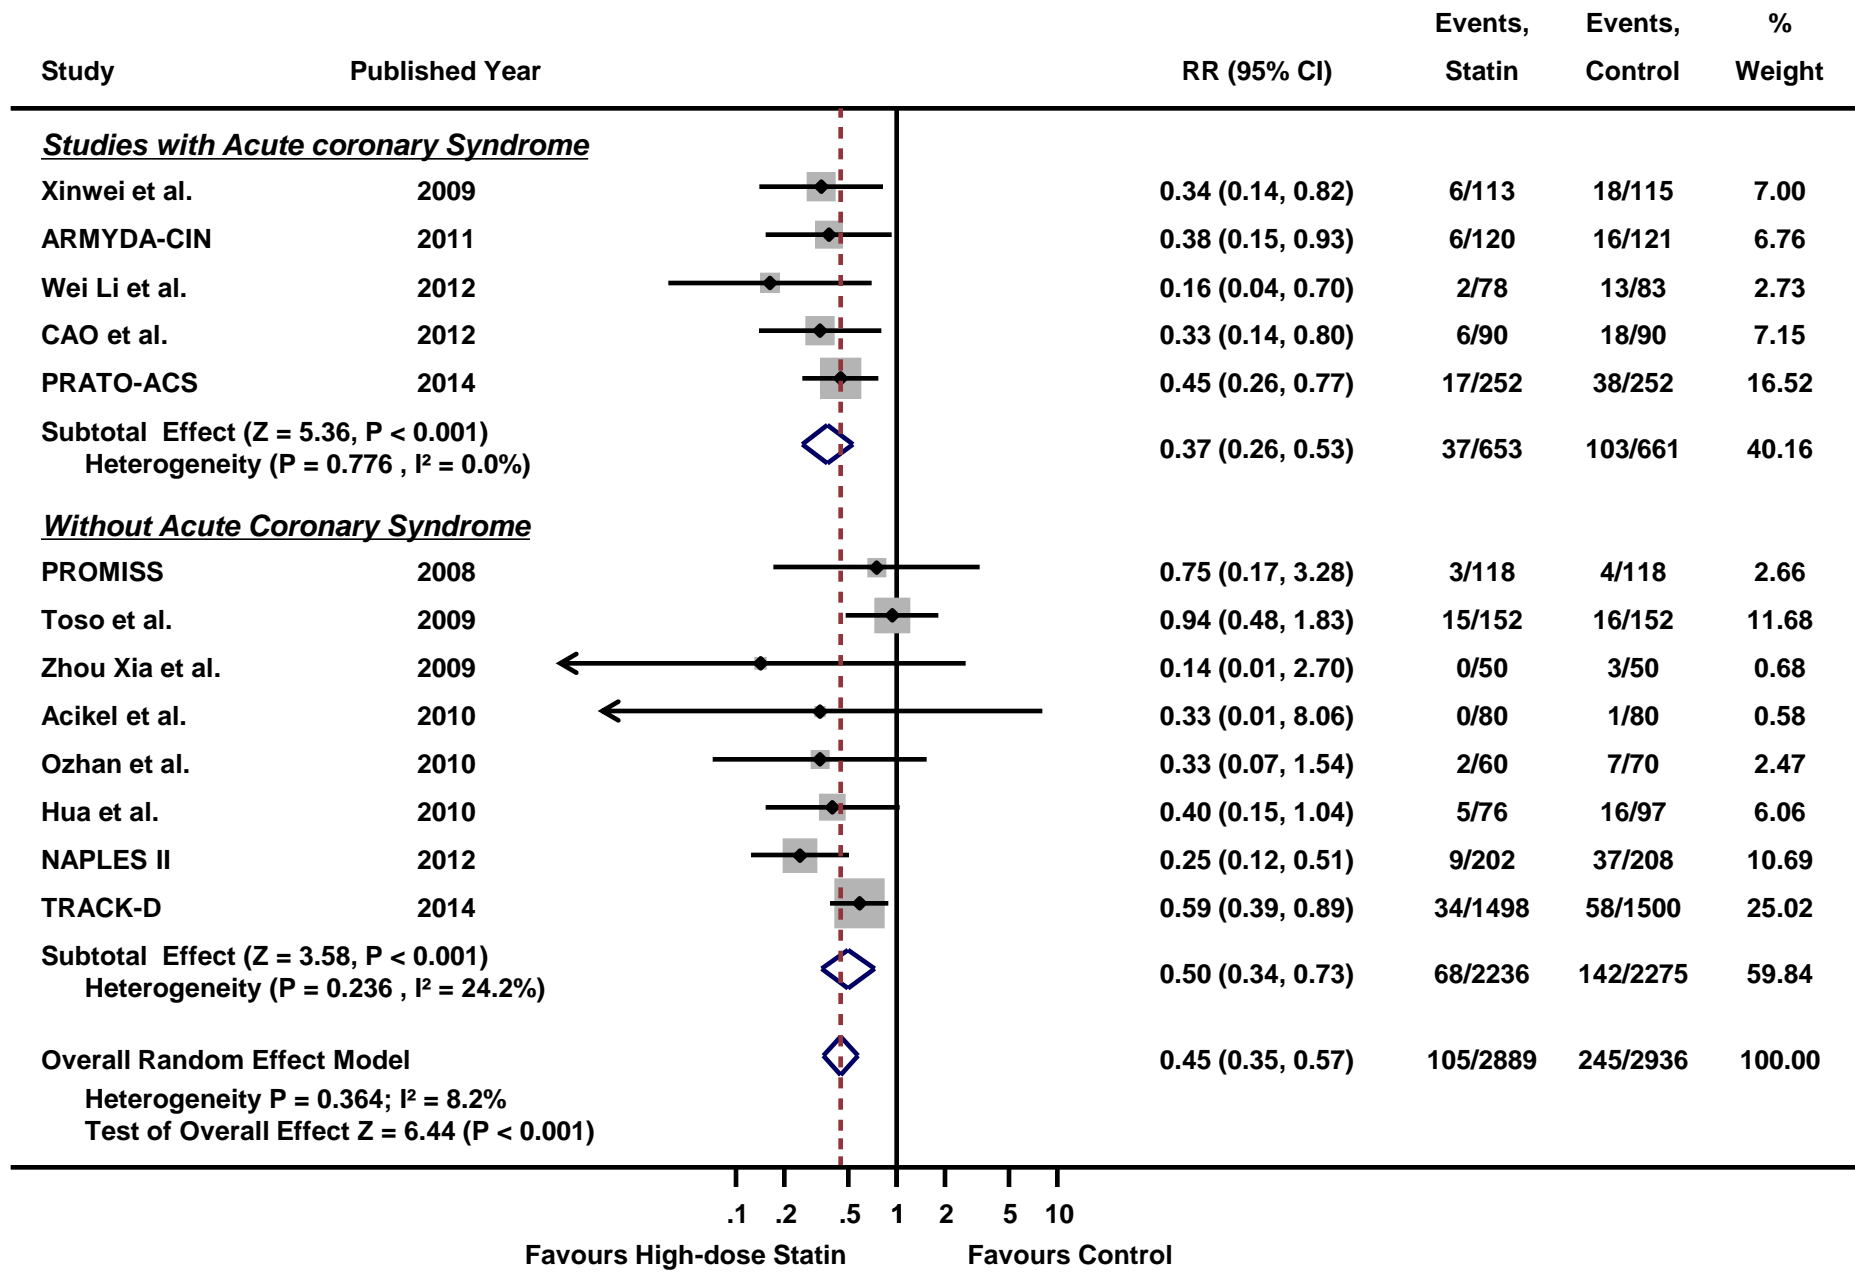

# Figure S12. Subgroup According to N-acetylcystein

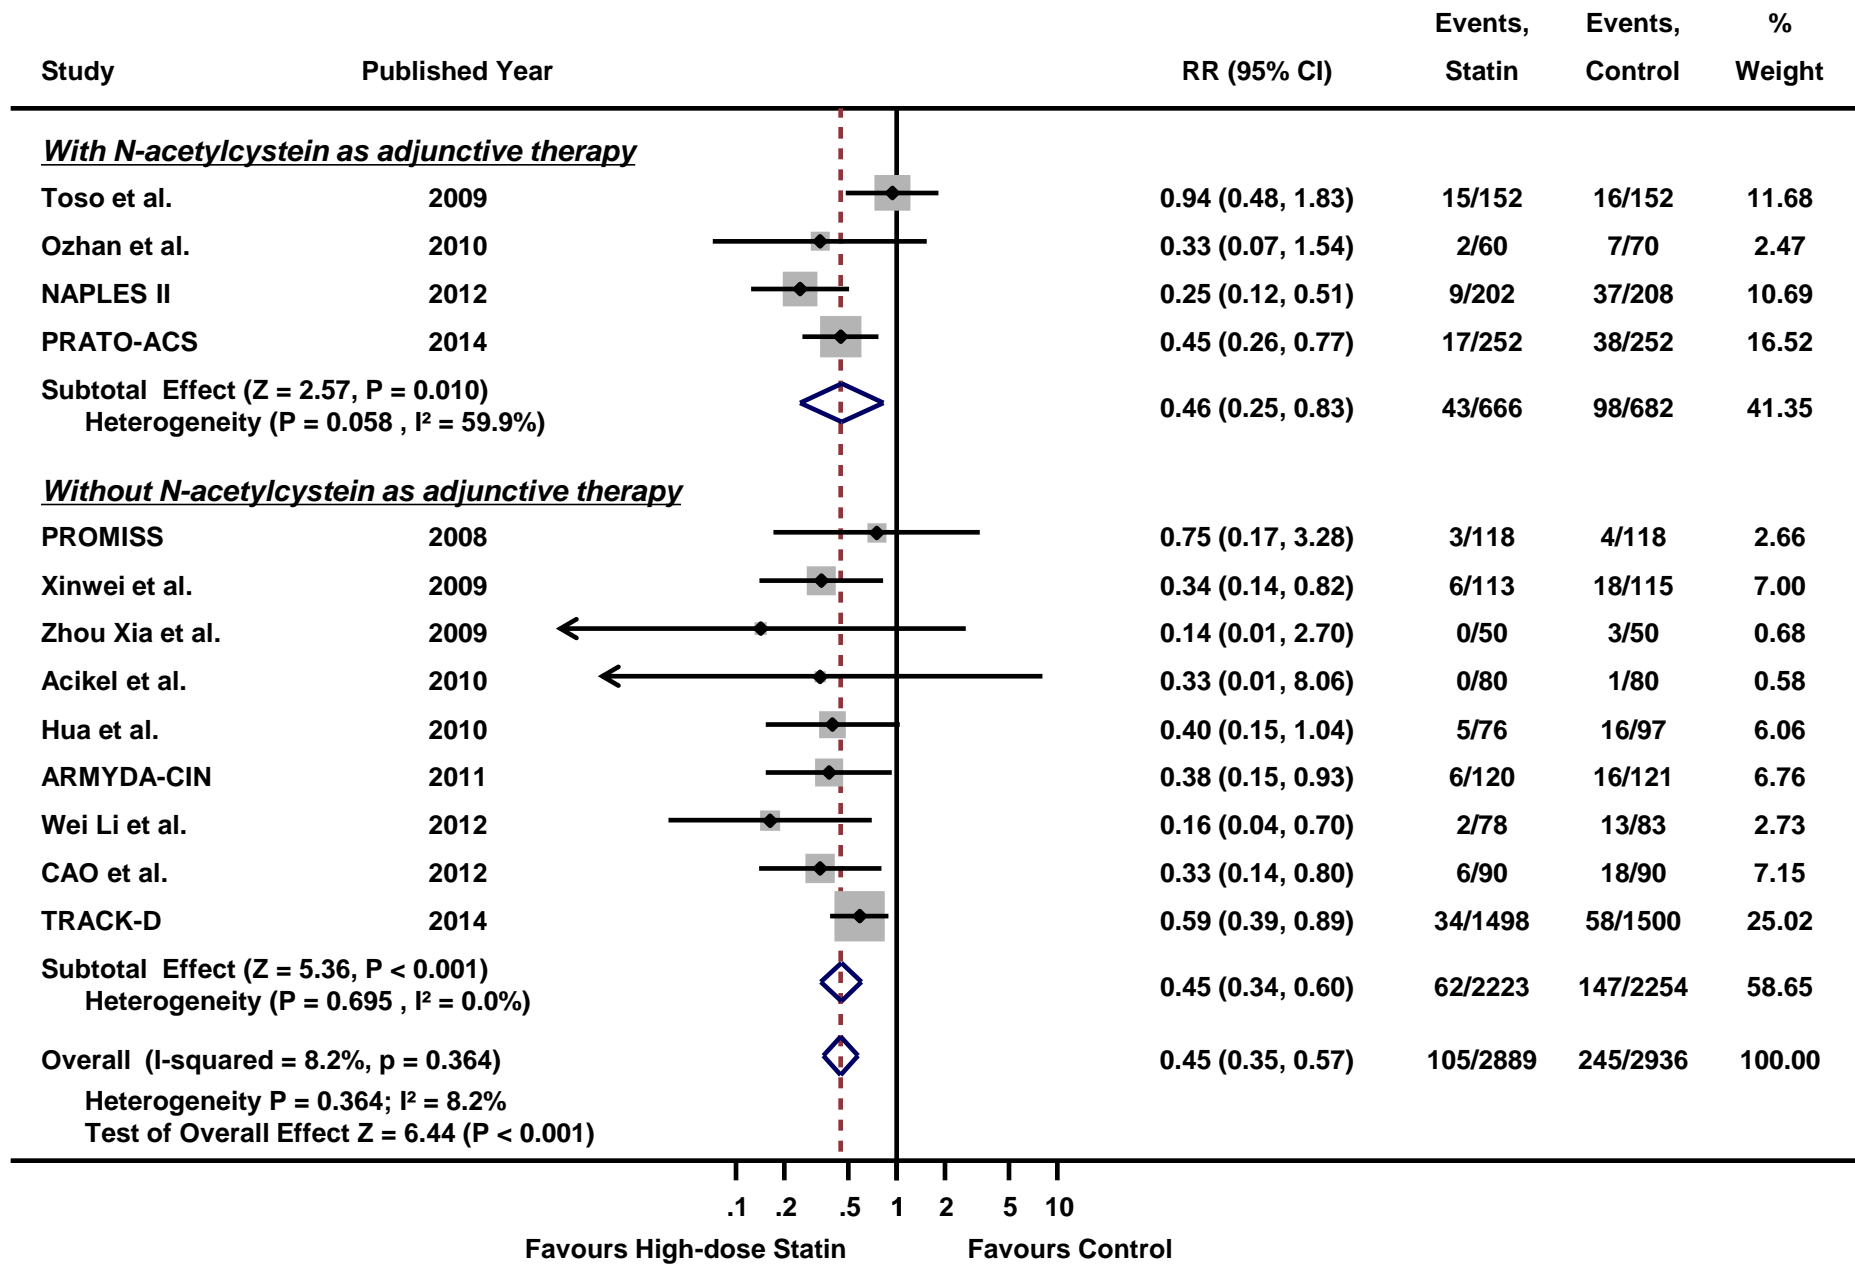

Supplement: pone.0111397.s002.pdf [file pone.0111397.s002.pdf]
